# Supplementary figures and images for: Efficacy of dezocine on preventing opioid-induced cough during general anaesthesia induction: a PRISMA-compliant systematic review and meta-analysis
Source: HighWire-hosted journal article supplement (doi:10.1136/bmjopen-2021-052142), 2022-04-01

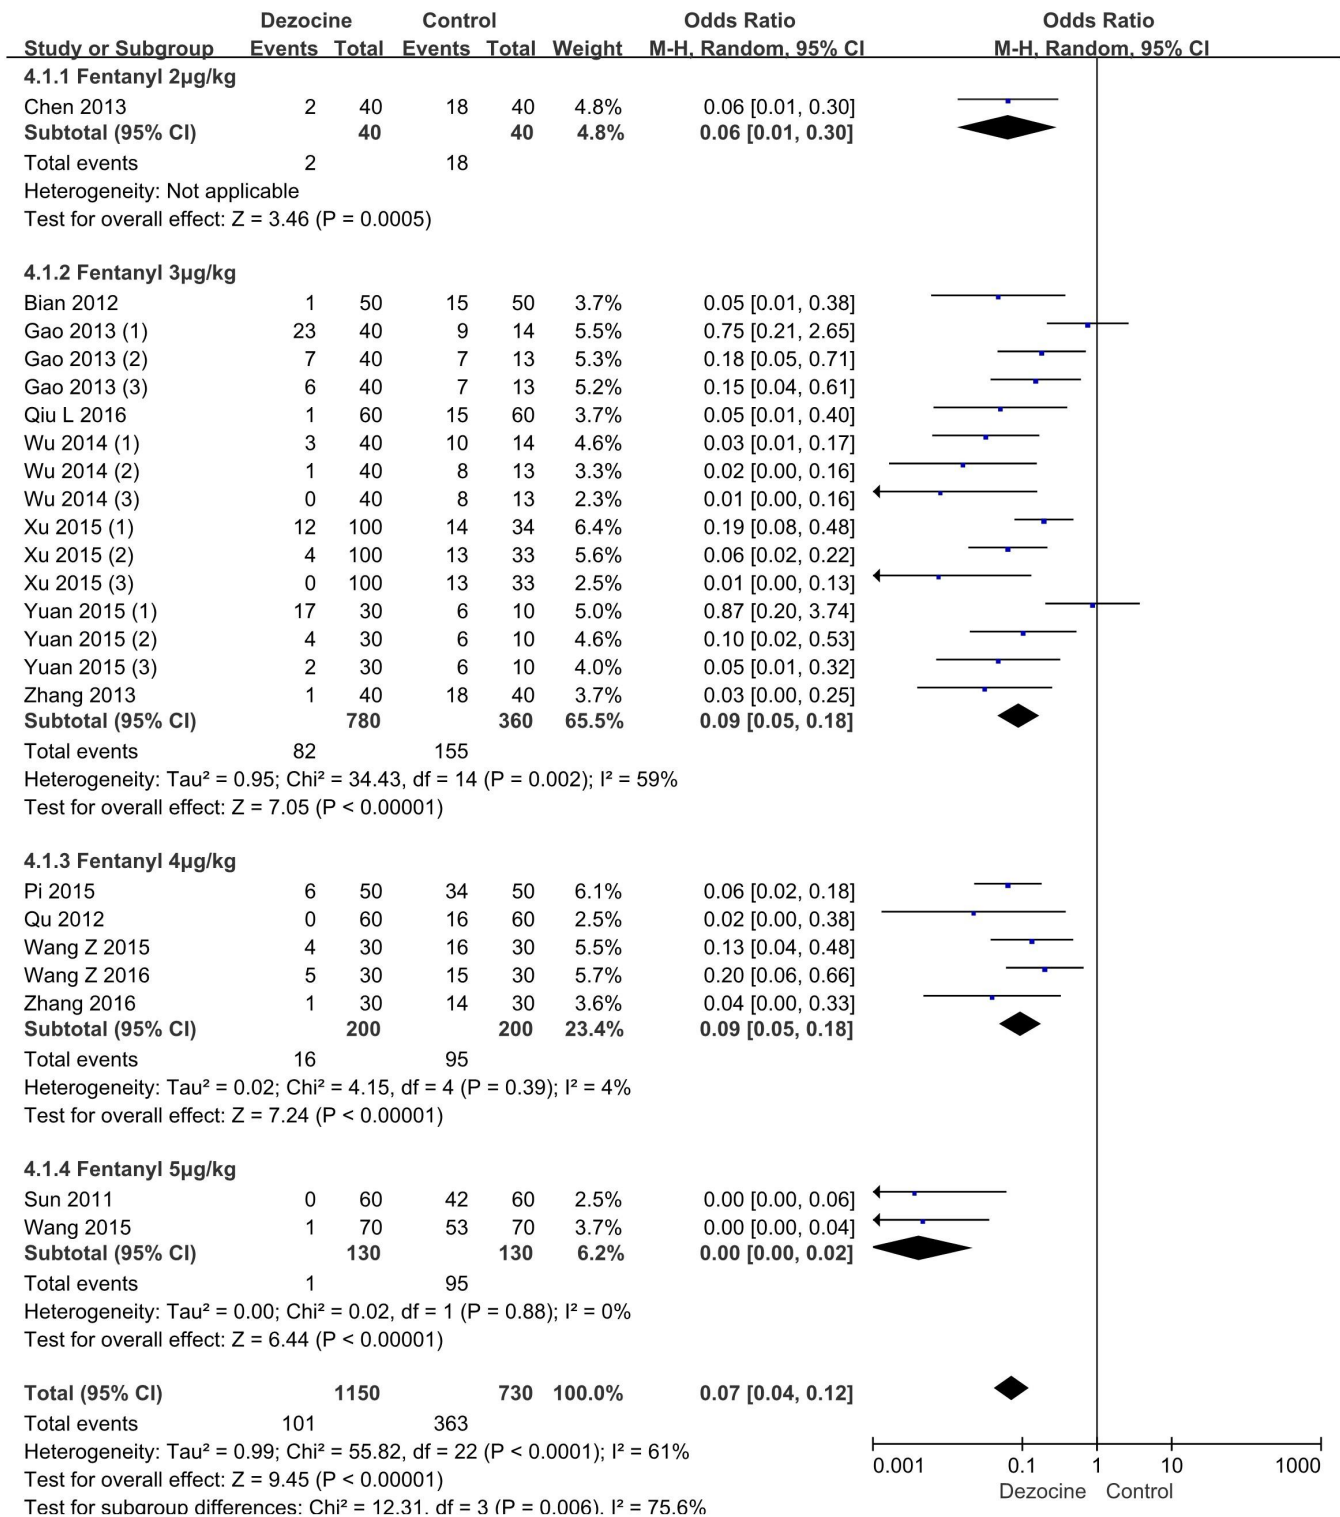

Supplement: bmjopen-2021-052142supp001_data_supplement.pdf [file bmjopen-2021-052142supp001_data_supplement.pdf]

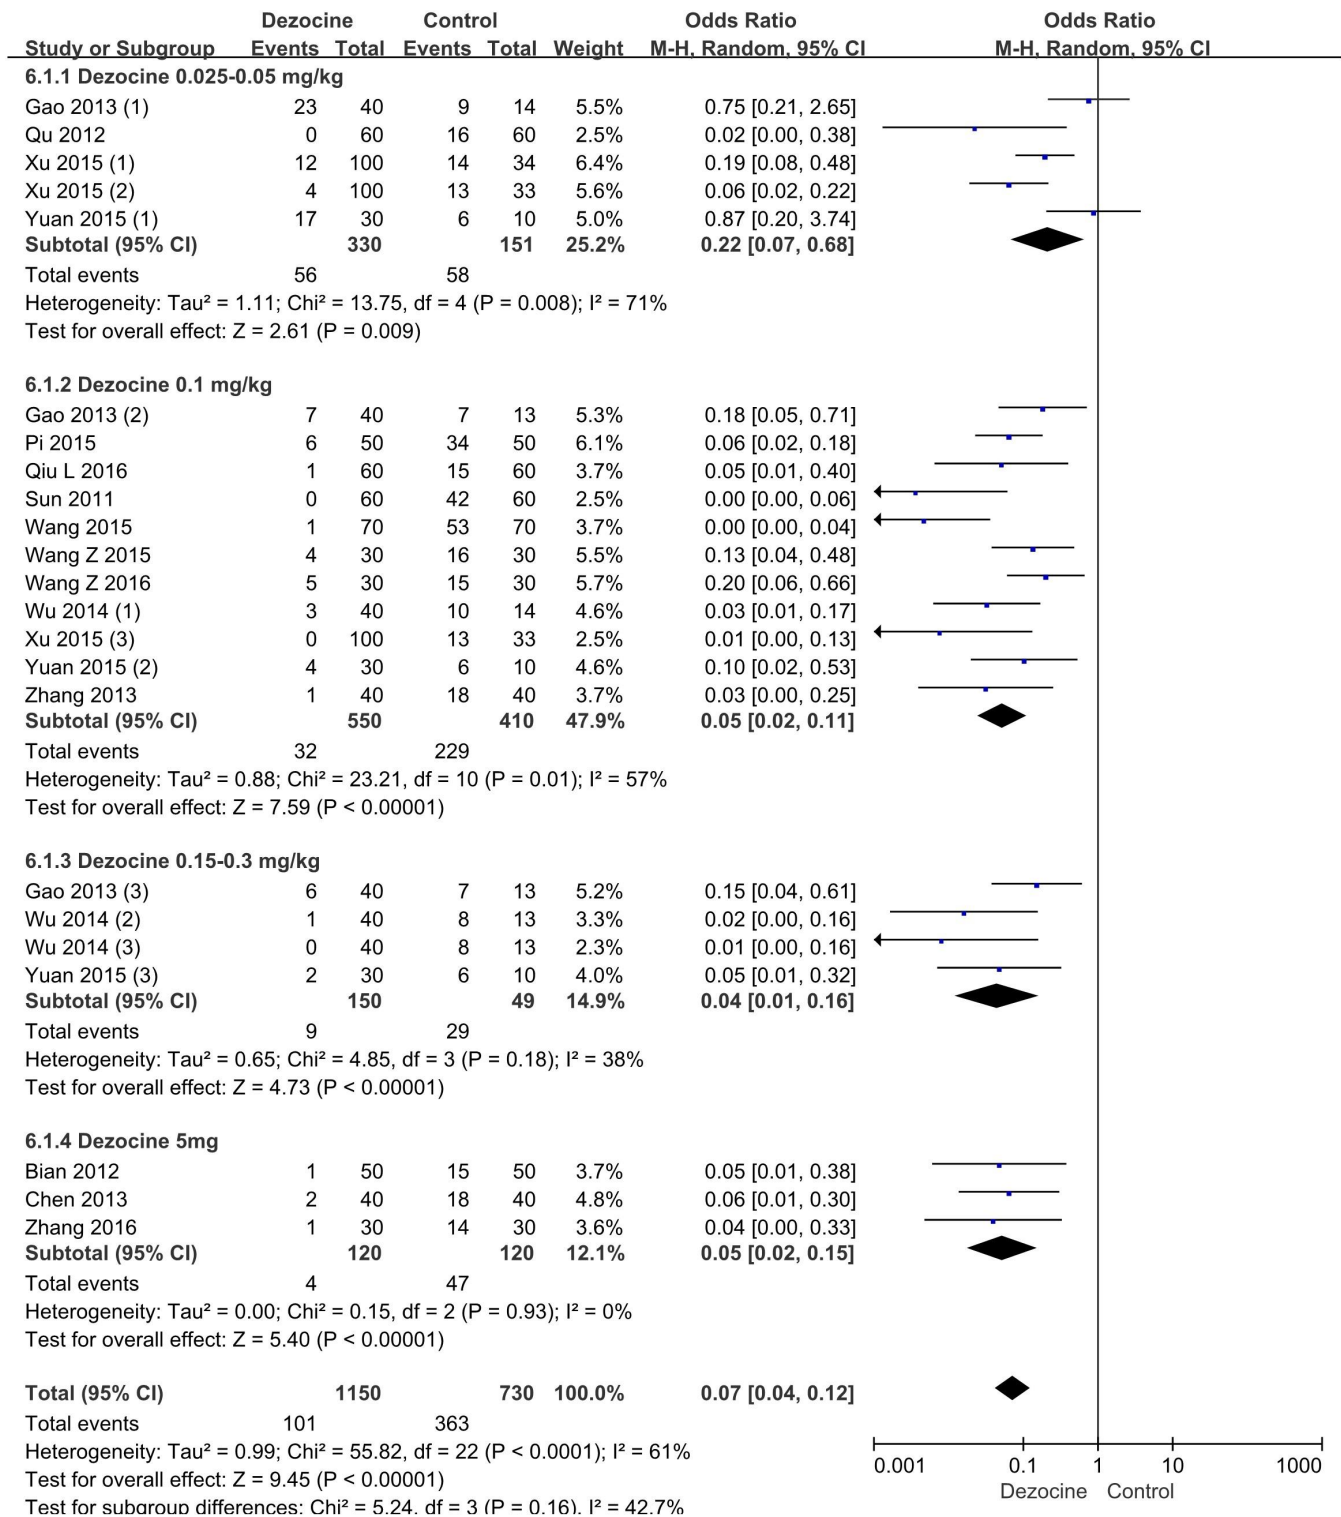

Supplement: bmjopen-2021-052142supp006_data_supplement.pdf [file bmjopen-2021-052142supp006_data_supplement.pdf]

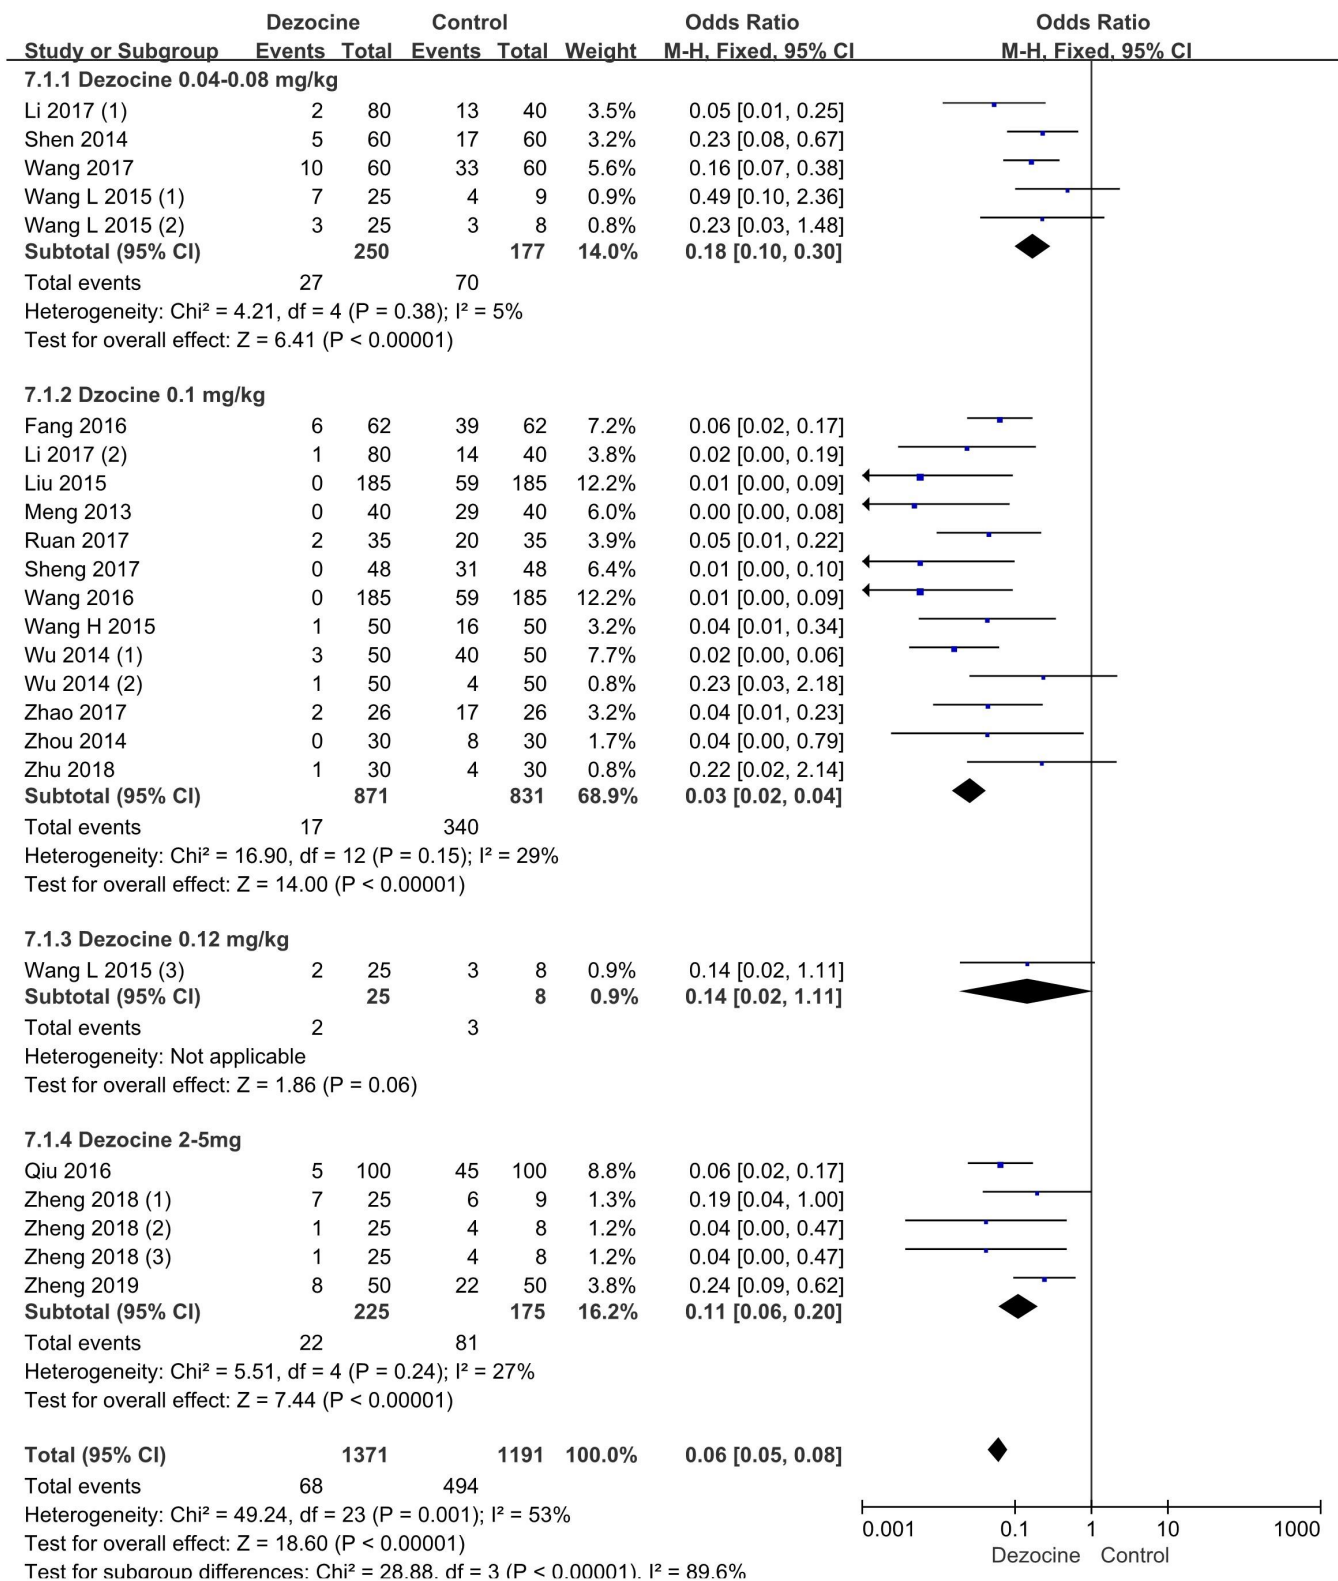

Supplement: bmjopen-2021-052142supp007_data_supplement.pdf [file bmjopen-2021-052142supp007_data_supplement.pdf]
